# Supplementary material for: Seed Priming with ZnO and Fe3O4 Nanoparticles Alleviate the Lead Toxicity in Basella alba L. through Reduced Lead Uptake and Regulation of ROS
Source: MDPI journal article supplement (doi:10.3390/plants11172227), 2022-08-28
Supplement: s1 [file s1]

**Supplementary Table S1.** Effects of different Pb concentrations on seed germination, seedlings growth, seedling biomass, vigour indices and Growth Tolerance Index in 20 days old *B. alba* seedling

| Lead (Pb) doses | Germination (%) | Root length (cm) | Shoot length (cm) | Seedling biomass (mg seedling <sup>-1</sup> ) | Vigour Index-I  | Vigour Index-II | GTI (%)     |              |                  |
|-----------------|-----------------|------------------|-------------------|-----------------------------------------------|-----------------|-----------------|-------------|--------------|------------------|
|                 |                 |                  |                   |                                               |                 |                 | Root tissue | Shoot tissue | Seedling biomass |
| 0 mM            | 71.0 ± 0.82 a   | 15.1 ± 0.24 a    | 11.6 ± 0.11 a     | 26.86 ± 0.08 a                                | 1895.0 ± 12.1 a | 1907.1 ± 3.7 a  | -           | -            | -                |
| 2 mM            | 70.0 ± 0.74 a   | 13.6 ± 0.29 b    | 10.5 ± 0.18 b     | 23.47 ± 0.10 b                                | 1689.1 ± 15.2 b | 1642.9 ± 4.5 b  | 90.5        | 90.3         | 90.8             |
| 4 mM            | 65.0 ± 0.45 b   | 13.1 ± 0.16 c    | 9.4 ± 0.08 c      | 18.96 ± 0.09 c                                | 1461.9 ± 9.5 c  | 1232.4 ± 6.5 c  | 86.7        | 81.2         | 73.3             |
| 6 mM            | 55.3 ± 0.55 c   | 9.4 ± 0.20 d     | 8.5 ± 0.19 d      | 15.07 ± 0.07 d                                | 991.0 ± 9.9 d   | 833.4 ± 3.9 d   | 62.3        | 73.4         | 58.3             |
| 8 mM            | 49.3 ± 0.59 d   | 8.1 ± 0.18 e     | 7.9 ± 0.21 e      | 11.65 ± 0.11 e                                | 786.3 ± 10.1 e  | 574.3 ± 7.5 e   | 53.7        | 67.6         | 45.1             |
| 10 mM           | 40.7 ± 0.49 e   | 5.6 ± 0.09 f     | 6.9 ± 0.10 f      | 7.89 ± 0.10 f                                 | 507.5 ± 13.2 f  | 321.1 ± 5.2 f   | 36.8        | 59.6         | 30.5             |
| 15 mM           | 31.3 ± 0.73 f   | 3.5 ± 0.12 g     | 5.3 ± 0.14 g      | 4.53 ± 0.11 g                                 | 276.4 ± 8.5 g   | 141.8 ± 5.0 g   | 23.3        | 45.8         | 17.5             |
| 20 mM           | 19.3 ± 0.68 g   | 1.2 ± 0.22 h     | 3.6 ± 0.19 h      | 2.32 ± 0.09 h                                 | 92.6 ± 10.3 h   | 44.8 ± 6.1 h    | 8.0         | 30.9         | 9.0              |

Values in the table are the mean of four replications ± standard error (SE). Different letters in each row are statistically significant at p < 0.05 level. Germination values are expressed in percentage and transformed to the respective angular (arc sin) values before subjecting them to statistical analysis.

**Supplementary Table S2.** Effects of seed priming with NPs and non-NPs on seed germination, seedlings growth, seedling biomass, vigour indices and Growth Tolerance Index (GTI) in 20 days old *B. alba* seedling

| Treatments                                                  | Germination %  | Root length (cm) | Shoot length (cm) | Seedling biomass (mg seedling <sup>-1</sup> ) | Vigour Index-I    | Vigour Index-II | GTI (%)     |              |                  |
|-------------------------------------------------------------|----------------|------------------|-------------------|-----------------------------------------------|-------------------|-----------------|-------------|--------------|------------------|
|                                                             |                |                  |                   |                                               |                   |                 | Root tissue | Shoot tissue | Seedling biomass |
| Control (0 mg.L <sup>-1</sup> NP)                           | 71.0 ± 0.82 cd | 15.1 ± 0.24 d    | 11.6 ± 0.11 ef    | 26.86 ± 0.08 de                               | 1895.0 ± 12.1 h   | 1907.1 ± 3.7 e  | -           | -            | -                |
| 50 mg.L <sup>-1</sup> ZnNPs                                 | 74.7 ± 0.77 bc | 15.2 ± 0.08 d    | 11.3 ± 0.08 f     | 26.90 ± 0.21 de                               | 1976.6 ± 18.2 fgh | 2009.4 ± 5.1 de | 100.5       | 97.3         | 100.1            |
| 100 mg.L <sup>-1</sup> ZnNPs                                | 76.3 ± 0.92 b  | 15.9 ± 0.09 c    | 12.0 ± 0.12 de    | 27.12 ± 0.23 d                                | 2127.2 ± 14.2 cd  | 2069.3 ± 9.6 d  | 105.5       | 103.1        | 101.0            |
| 200 mg.L <sup>-1</sup> ZnNPs                                | 82.3 ± 0.62 a  | 17.3 ± 0.11 b    | 13.9 ± 0.15 b     | 30.42 ± 0.19 b                                | 2566.1 ± 8.5 b    | 2503.6 ± 3.3 b  | 114.9       | 119.4        | 113.3            |
| 300 mg.L <sup>-1</sup> ZnNPs                                | 75.7 ± 0.88 b  | 14.1 ± 0.12 e    | 11.2 ± 0.09 f     | 26.52 ± 0.18 e                                | 1915.2 ± 11.0 gh  | 2007.6 ± 8.4 de | 93.6        | 96.4         | 98.7             |
| 500 mg.L <sup>-1</sup> ZnNPs                                | 67.3 ± 0.51 d  | 12.1 ± 0.08 f    | 8.7 ± 0.07 g      | 21.45 ± 0.09 g                                | 1401.2 ± 13.1 i   | 1443.6 ± 7.2 f  | 80.3        | 75.0         | 79.9             |
| 50 mg.L <sup>-1</sup> FeNPs                                 | 75.7 ± 0.42 b  | 15.2 ± 0.18 d    | 11.4 ± 0.15 f     | 26.76 ± 0.24 de                               | 2017.4 ± 12.9 efg | 2025.7 ± 7.9 de | 101.1       | 98.3         | 99.6             |
| 100 mg.L <sup>-1</sup> FeNPs                                | 77.3 ± 0.55 b  | 15.8 ± 0.16 c    | 12.7 ± 0.11 c     | 28.45 ± 0.13 c                                | 2199.2 ± 11.8 c   | 2199.2 ± 4.6 c  | 104.7       | 109.0        | 105.9            |
| 200 mg.L <sup>-1</sup> FeNPs                                | 84.3 ± 0.67 a  | 18.2 ± 0.10 a    | 15.0 ± 0.10 a     | 31.24 ± 0.17 a                                | 2796.2 ± 10.5 a   | 2633.5 ± 5.1 a  | 120.9       | 128.7        | 116.3            |
| 300 mg.L <sup>-1</sup> FeNPs                                | 76.0 ± 0.70 b  | 14.8 ± 0.13 d    | 12.3 ± 0.13 cd    | 25.25 ± 0.09 f                                | 2059.6 ± 9.4 def  | 1919.0 ± 6.3 e  | 98.2        | 105.9        | 94.0             |
| 500 mg.L <sup>-1</sup> FeNPs                                | 68.7 ± 0.89d   | 10.3 ± 0.15 g    | 8.3 ± 0.14 g      | 20.14 ± 0.14 h                                | 1281.9 ± 9.8 j    | 1383.6 ± 5.9 f  | 68.6        | 71.6         | 75.0             |
| ddH <sub>2</sub> O (Hydro-primed)                           | 74.3 ± 0.53 bc | 15.9 ± 0.09 c    | 12.6 ± 0.08 c     | 28.14 ± 0.10 c                                | 2116.1 ± 10.2 cde | 2090.8 ± 4.8 cd | 105.2       | 108.6        | 104.8            |
| 200 mg.L <sup>-1</sup> ZnSO <sub>4</sub> .7H <sub>2</sub> O | 74.8 ± 0.66 bc | 16.1 ± 0.07 c    | 12.4 ± 0.05 cd    | 28.51 ± 0.14 d                                | 2131.5 ± 13.6 cd  | 2057.0 ± 4.6 d  | 106.6       | 106.9        | 106.1            |
| 200 mg.L <sup>-1</sup> FeSO <sub>4</sub> .7H <sub>2</sub> O | 75.3 ± 0.49 b  | 16.6 ± 0.10 bc   | 13.2 ± 0.08 c     | 29.10 ± 0.19 c                                | 2243.9 ± 7.7 c    | 2115.9 ± 5.8 cd | 109.9       | 113.8        | 108.3            |

Values in the table are the mean of four replications ± standard error (SE). Different letters in each row are statistically significant at p < 0.05 level. Germination values are expressed in percentage and transformed to the respective angular (arc sin) values before subjecting them to statistical analysis.
